# Supplementary material
Source: publisher figshare collection journal article supplement (https://acs.figshare.com/ndownloader/files/3905665)

**Supplemental Figure 3.** Reproducibility of analytical parameters from the replicate analysis of 337 interference-free peptides (represents 155 proteins) in human CSF. The distribution (as %CV) of peak width and relative response (as NAT/SIS) is shown in **a)**, while the retention time is in **b)** for the 5 analytical replicates of level 5 n the 7-point standard curve.

**a)**

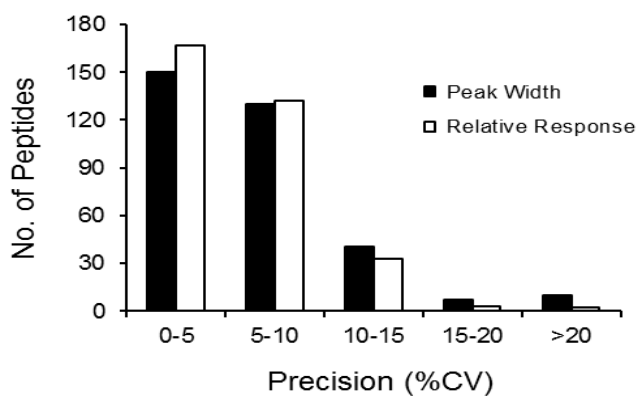

**b)**

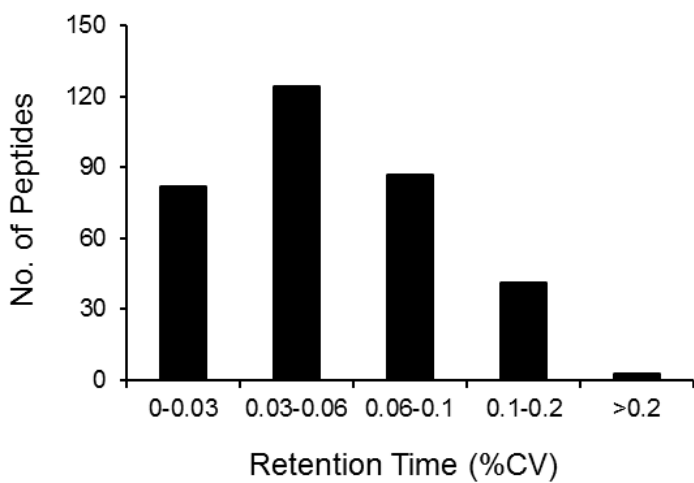

Supplement: Supplementary file 1 [file 3905665]
